# Supplementary material for: Intrinsic toughened conductive thermosetting epoxy resins: utilizing dynamic bond and electrical conductivity to access electric and thermal dual-driven shape memory
Source: Royal Society of Chemistry journal article supplement (doi:10.1039/d2qm00509c), 2022-01-01
Supplement: d2qm00509c1.pdf [file d2qm00509c1.pdf]

## Supporting Information

### **Intrinsic toughened conductive thermosetting epoxy resins: utilizing dynamic bond and electrical conductivity to access electric and thermal dual-driven shape memory**

Shiwei Zhao<sup>a</sup>, Qinfeng Liu<sup>a</sup>, Anqian Yuan<sup>a</sup>, Zhimeng Liu<sup>b</sup>, Shiyi Zhou<sup>c</sup>, Xiaowei Fu<sup>a</sup>, Jingxin lei<sup>a\*</sup>,  
Liang Jiang<sup>a\*</sup>

<sup>a</sup> *State Key Laboratory of Polymer Materials Engineering, Polymer Research Institute of Sichuan University, Chengdu 610065, China.*

<sup>b</sup> *School of Chemical Engineering, Sichuan University, Chengdu 610065, PR China.*

<sup>c</sup> *College of Materials and Chemistry & Chemical Engineering, Chengdu University of Technology, Chengdu, 610059, China.*

\*Corresponding authors.

E-mail addresses: [jxlei@scu.edu.cn](mailto:jxlei@scu.edu.cn) (J. Lei); [jl9008@126.com](mailto:jl9008@126.com), [liangjiang@scu.edu.cn](mailto:liangjiang@scu.edu.cn) (L. Jiang).

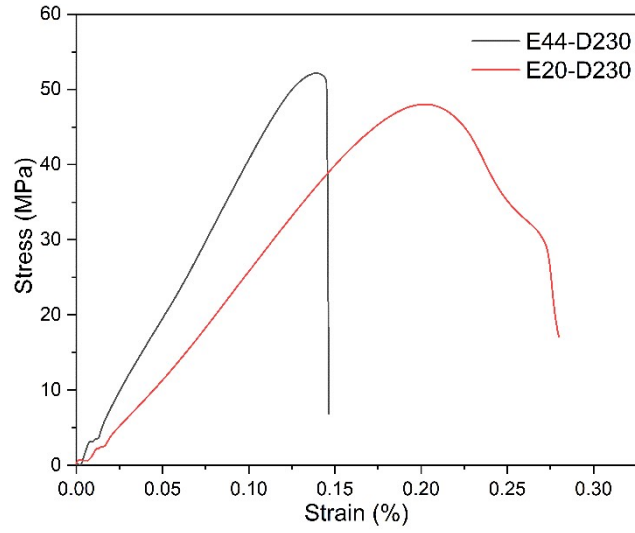

Figure S1 The Tensile stress–strain curves of original epoxy resin matrix.

Video S1 The process of Electro-induced shape memory
